# Supplementary material for: Rapid atmospheric carbon dioxide fixation by nickel(ii) complexes: meridionally coordinated diazepane-based 3N ligands facilitate fixation
Source: Royal Society of Chemistry journal article supplement (doi:10.1039/d1dt00299f), 2021-01-01
Supplement: d1dt00299f1.pdf [file d1dt00299f1.pdf]

## Supplementary Information

### **Rapid Atmospheric Carbon Dioxide Fixation by Nickel(II) Complexes: Meridionally Coordinated Diazepane-based 3N Ligands Facilitate Fixation**

Tamilarasan Ajaykamal,<sup>a</sup> Mitu Sharma,<sup>b</sup> Nasreen S. Islam<sup>b</sup> and Mallayan Palaniandavar<sup>a\*</sup>

<sup>a</sup>School of Chemistry, Bharathidasan University, Tiruchirappalli 620024, Tamilnadu, India

<sup>b</sup>Department of Chemical Sciences, Tezpur University, Tezpur, Assam, India

**Computed Structures of 1 and 2.** We have performed computational analysis by using Density Functional Theory (DFT). And the optimized geometry of complexes **1** and **2** are shown in **Fig S1**. The computed structural parameters of the complexes are provided in Table S2.

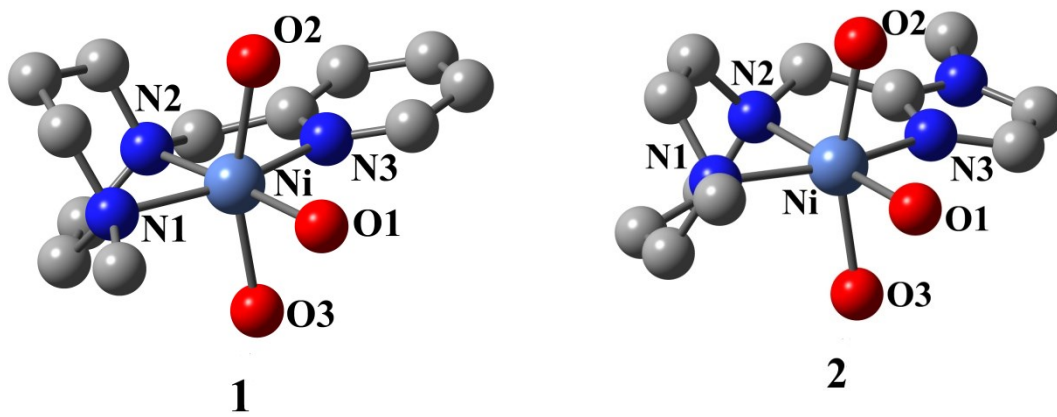

**Fig. S1.** The computed structures of cations of a)  $[\text{Ni}(\text{L1})(\text{H}_2\text{O})_2](\text{ClO}_4)_2$  **1** and  $[\text{Ni}(\text{L2})(\text{H}_2\text{O})_2](\text{ClO}_4)_2 \cdot 2\text{H}_2\text{O}$  **2**

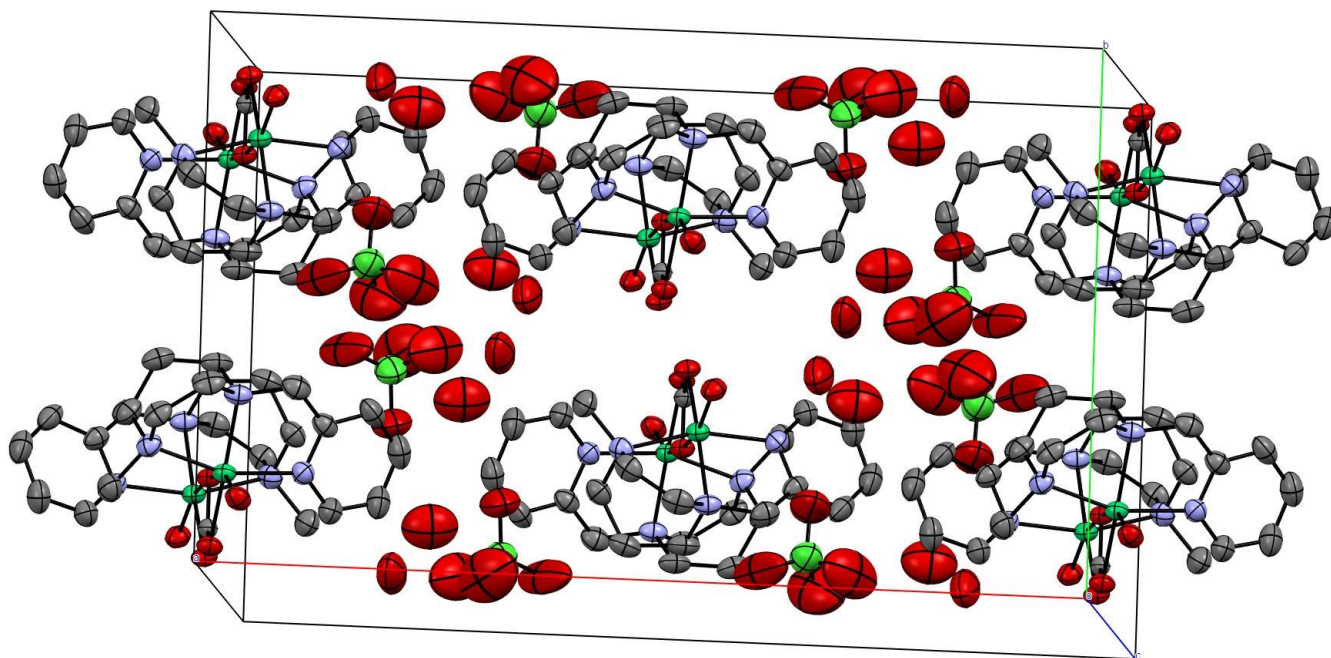

**Fig. S2.** The packing diagram of  $[\text{Ni}_2(\text{L1})_2(\mu\text{-CO}_3)(\text{H}_2\text{O})_2](\text{ClO}_4)_2 \cdot 4\text{H}_2\text{O}$  **3**

**Table S1.** Structure refinement details for  $[\text{Ni}_2(\text{L1})_2(\mu\text{-CO}_3)(\text{H}_2\text{O})_2](\text{ClO}_4)_2 \cdot 4\text{H}_2\text{O}$  **3**

---

| <b>3</b>                             |                                                                           |
|--------------------------------------|---------------------------------------------------------------------------|
| Sum formula                          | $\text{C}_{25}\text{H}_{42}\text{Cl}_2\text{N}_6\text{Ni}_2\text{O}_{17}$ |
| Formula weight                       | 886.96                                                                    |
| Temperature (K)                      | 296(2)                                                                    |
| Wavelength (Å)                       | 0.71073                                                                   |
| Crystal system                       | monoclinic                                                                |
| Space group                          | C2/c                                                                      |
| a(Å)                                 | 22.909(10)                                                                |
| b(Å)                                 | 14.148(6)                                                                 |
| c(Å)                                 | 12.037(5)                                                                 |
| $\alpha$ (°)                         | 90                                                                        |
| $\beta$ (°)                          | 101.433(6)                                                                |
| $\gamma$ (°)                         | 90                                                                        |
| Volume (Å <sup>3</sup> )             | 3824(3)                                                                   |
| Z                                    | 4                                                                         |
| $D_c$ (g.cm <sup>-3</sup> )          | 1.541                                                                     |
| Reflections collected                | 25799                                                                     |
| Goodness-of-fit on F <sup>2</sup>    | 1.022                                                                     |
| Final R indices [ $I > 2\sigma(I)$ ] | 0.0629, $wR_2 = 0.1710$                                                   |
| R indices (all data)                 | 0.1049, $wR_2 = 0.2037$                                                   |

---

### Determination of magnetic moment of complex **1** and the intermediate derived from it

Evans' method was used of  $^1\text{H}$ -NMR performed to determine the magnetic moment of complex **1** and the intermediate **1a** derived from it.<sup>S1-S2</sup> A coaxial insert (with a sealed capillary) tube containing  $\text{CD}_3\text{OD}$  solvent (with 0.03% TMS) was inserted into the normal NMR tube containing the complex **1** (0.0053 M, with 0.03% TMS). We have calculated the chemical shift value of the TMS peak in the presence of the complex **1** in the outer NMR tube with respect to that of the TMS peak in the coaxial insert. The magnetic moment was calculated using the equation,

$$\begin{aligned}\mu_{\text{eff}} &= 0.0618 (\Delta\nu T / 2fM)^{1/2} \\ \mu_{\text{eff}} &= 0.0618 \times (32 \times 298 / 2 \times 400 \times 0.0053)^{1/2} \\ \mu_{\text{eff}} &= 2.93 \text{ BM}\end{aligned}$$

Where  $f$  = oscillator frequency (400 MHz) of the superconducting spectrometer,  $T$  = absolute temperature,  $M$  = molar concentration of the complex **1**, and  $\nu$  = difference in frequency (Hz) between the two TMS signals (**Fig. S3**). The magnetic moment of complex **1** was calculated as 2.91 BM in  $\text{CD}_3\text{OD}$  at RT, suggesting the presence of 2 unpaired electrons in complex **1**. When  $\text{Et}_3\text{N}$  (0.0053 M, 50  $\mu\text{L}$ ) was added to this solution to generate a red coloured solution no shift was observed illustrating the formation of an intermediate species (low-spin) with no unpaired electron.

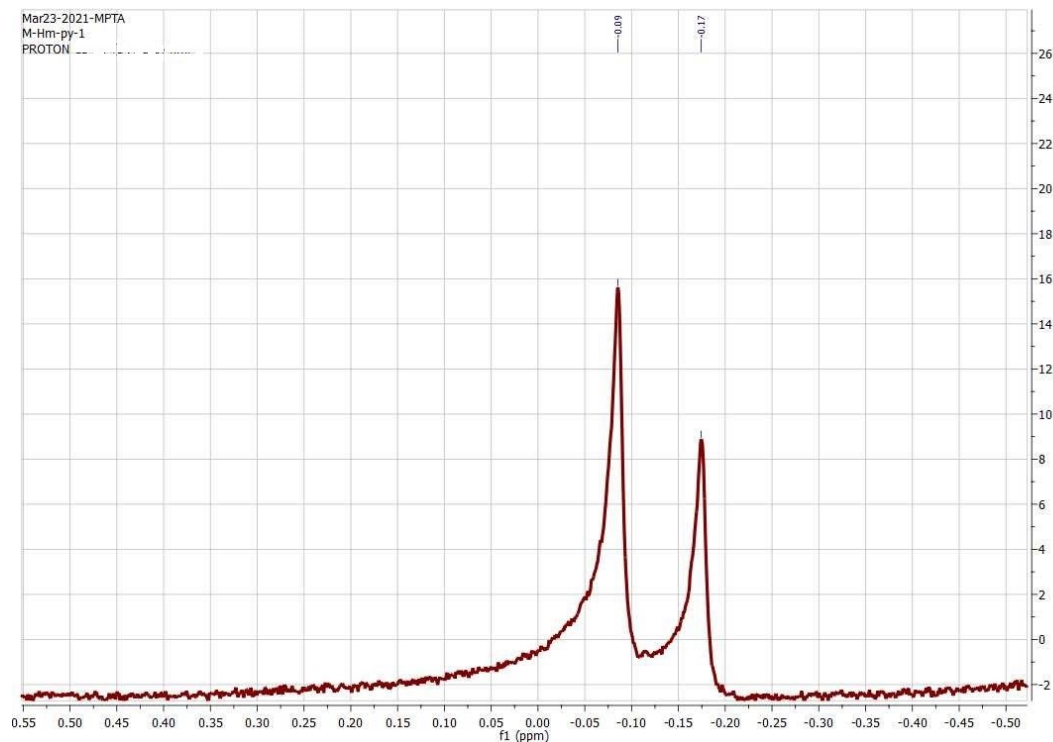

**Fig. S3.** Evan's method:  $^1\text{H}$  NMR of spectra  $[\text{Ni}(\text{L1})(\text{H}_2\text{O})_2](\text{ClO}_4)_2$  **1**

**Table S2.** Computed bond angles [°] of complexes **1**, **2** and the intermediates **1a** and **2a**

|          | <b>1</b> | <b>2</b>  | <b>1a</b> | <b>2a</b> |
|----------|----------|-----------|-----------|-----------|
| N1–Ni–N2 | 77.9233  | 77.6300   | 83.15489  | 83.0770   |
| N1–Ni–N3 | 160.9597 | 160.4098  | 168.9002  | 168.2117  |
| N1–Ni–O1 | 102.1390 | 100.0281  | 100.2062  | 100.5885  |
| N1–Ni–O2 | 96.9739  | 98.6302   | -         | -         |
| N1–Ni–O3 | 95.5328  | 94.97454  | -         | -         |
| N2–Ni–N3 | 83.1128  | 82.78310  | 86.2089   | 85.2117   |
| N2–Ni–O1 | 176.4011 | 176.7345  | 176.4794  | 176.2916  |
| N2–Ni–O2 | 100.9030 | 100.96143 | -         | -         |
| N2–Ni–O3 | 94.2153  | 93.7329   | -         | -         |
| N3–Ni–O1 | 96.8947  | 99.5575   | 90.3757   | 91.1363   |
| N3–Ni–O2 | 84.8690  | 84.6499   | -         | -         |
| N3–Ni–O3 | 87.4837  | 86.5886   | -         | -         |
| O1–Ni–O2 | 82.6746  | 84.1666   | -         | -         |
| O1–Ni–O3 | 82.1922  | 81.5814   | -         | -         |
| O2–Ni–O3 | 162.0853 | 161.7781  |           | -         |

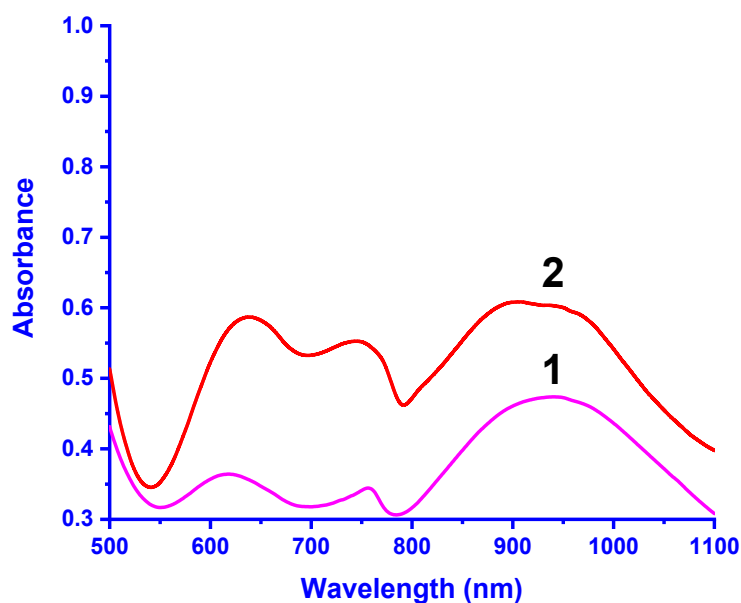

**Fig. S4.** Electronic absorption spectra of  $[\text{Ni}(\text{L}1)(\text{H}_2\text{O})_3](\text{ClO}_4)_2$  **1** and  $[\text{Ni}(\text{L}2)(\text{H}_2\text{O})_3](\text{ClO}_4)_2 \cdot 2\text{H}_2\text{O}$  **2** in methanol solution at 25 °C. Conc: **1**,  $4.5 \times 10^{-3}$ ; **2**,  $3.3 \times 10^{-3}$  M)

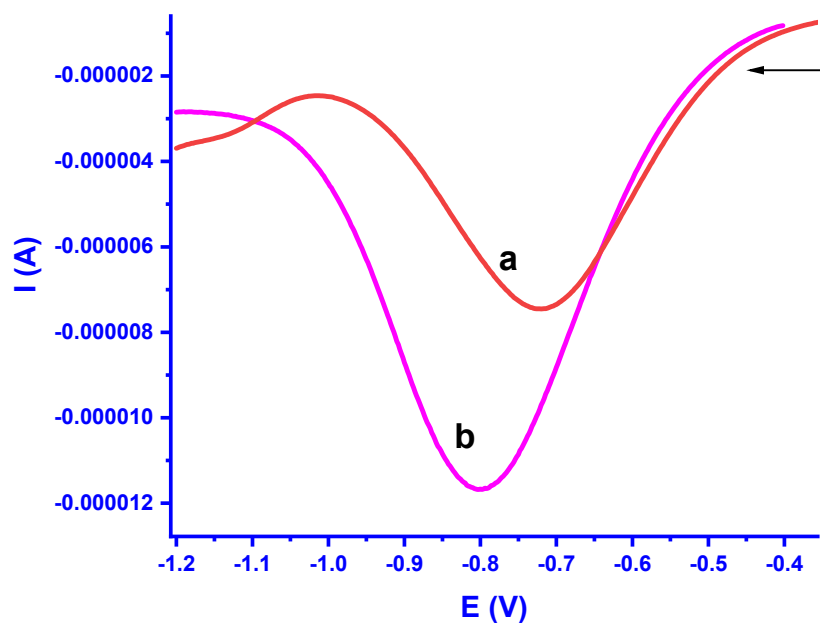

**Fig. S5.** Differential Pulse Voltammetry (DPV) of complexes **1** ( $1.9 \times 10^{-3}$  M) and **3** ( $1.8 \times 10^{-3}$  M) in methanol solution at 25 °C. Conditions: supporting electrolyte, 0.1 M TBAP; Scan rate, 50  $\text{mVs}^{-1}$ ; reference electrode, Calomel; working electrode, Glassy carbon; Counter electrode, platinum plate

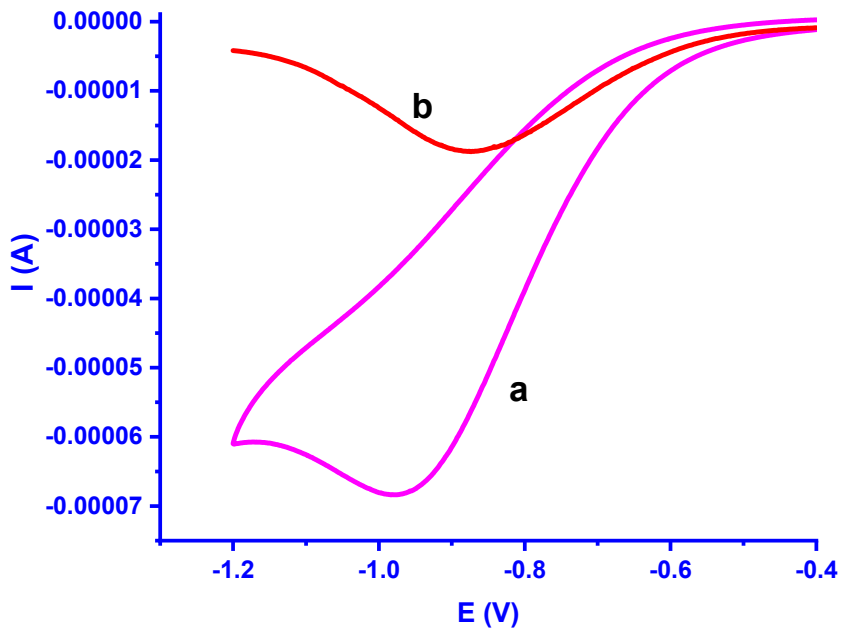

**Fig. S6.** Cyclic voltammogram (a) and DPV (b) of complex **2** ( $5.2 \times 10^{-3}$ ) in methanol solution at 25 °C. Conditions: supporting electrolyte, 0.1 M TBAP; Scan rate, 50 mVs<sup>-1</sup>; reference electrode, Calomel; working electrode, Glassy carbon; Counter electrode, platinum plate.

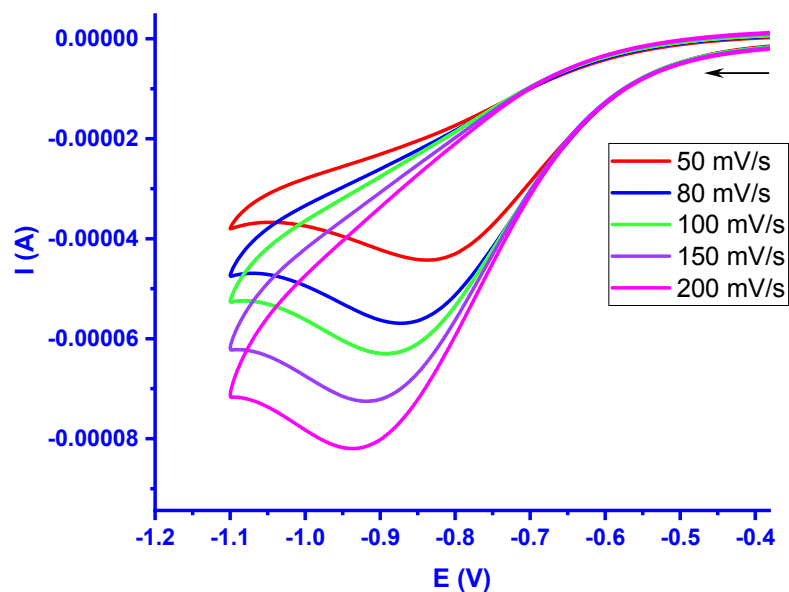

**Fig. S7.** Cyclic voltammograms of complex **1** ( $1.9 \times 10^{-3}$  M) in methanol solution at 25 °C at different scan rates.

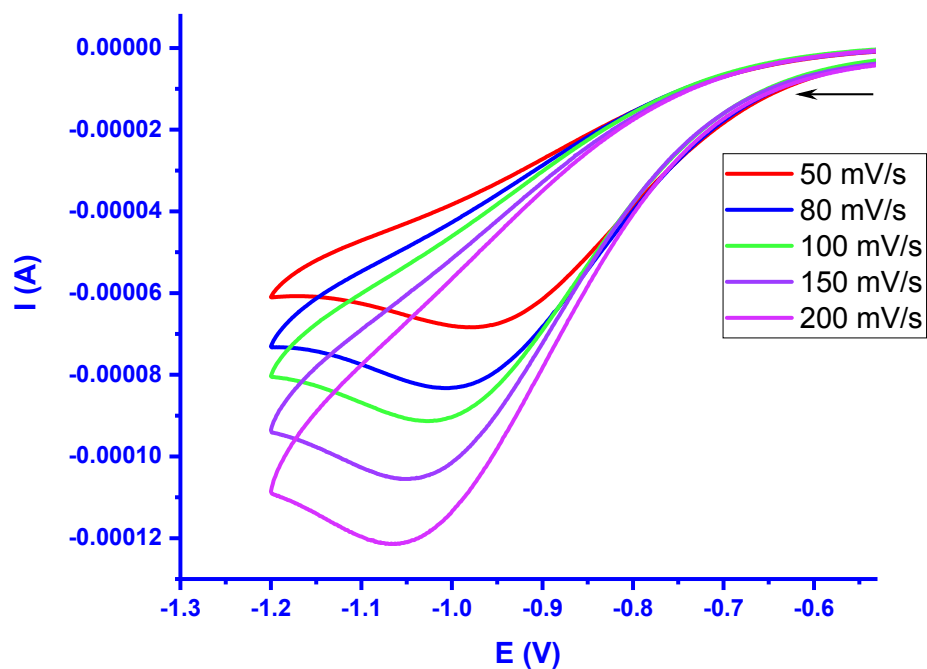

**Fig. S8.** Cyclic voltammograms of complex **2** ( $5.2 \times 10^{-3}$ ) in methanol solution at 25 °C at different scan rates.



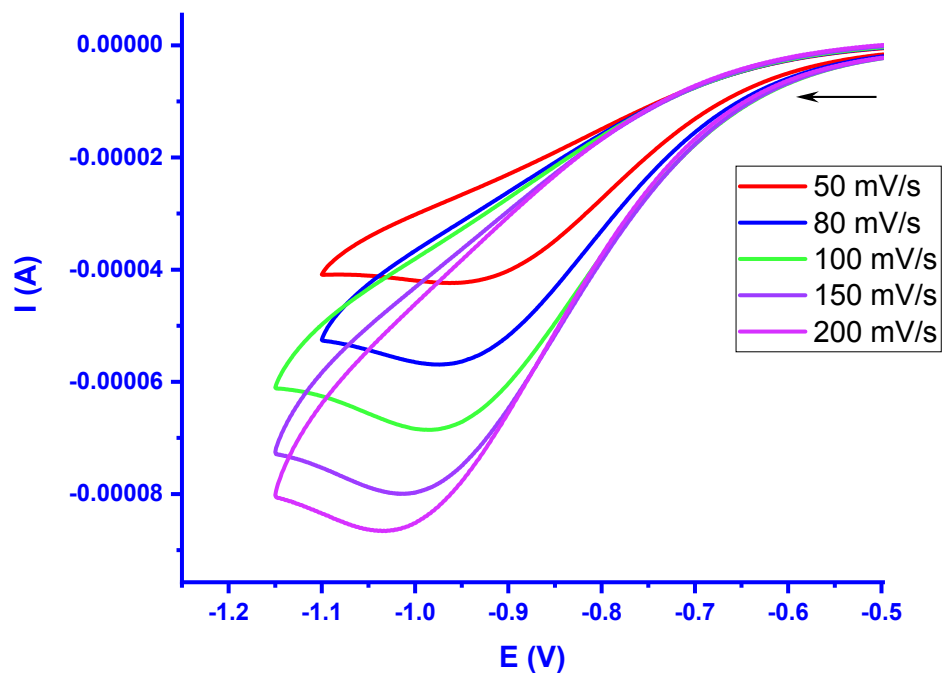

**Fig. S9.** Cyclic voltammograms of complex **3** ( $1.8 \times 10^{-3}$  M) in methanol solution at 25 °C at different scan rates.

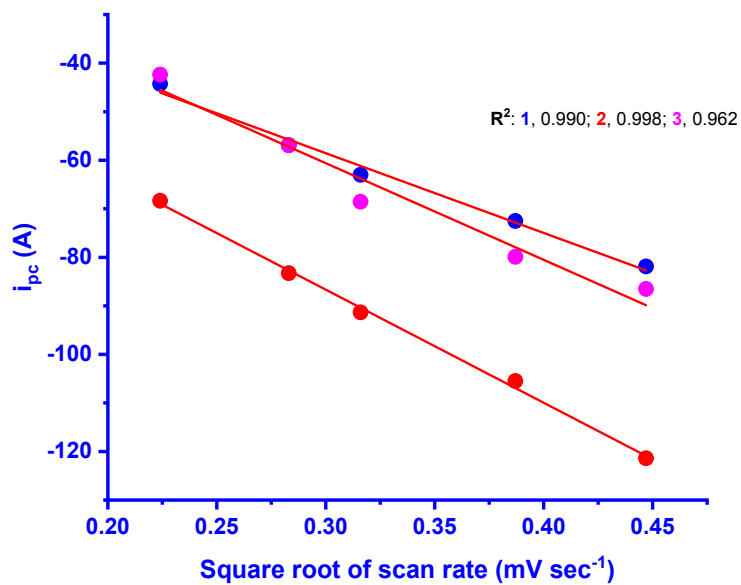

**Fig. S10.** Plots of  $i_{pc}$  (A) vs square root of scan rate ( $\text{mV sec}^{-1}$ )

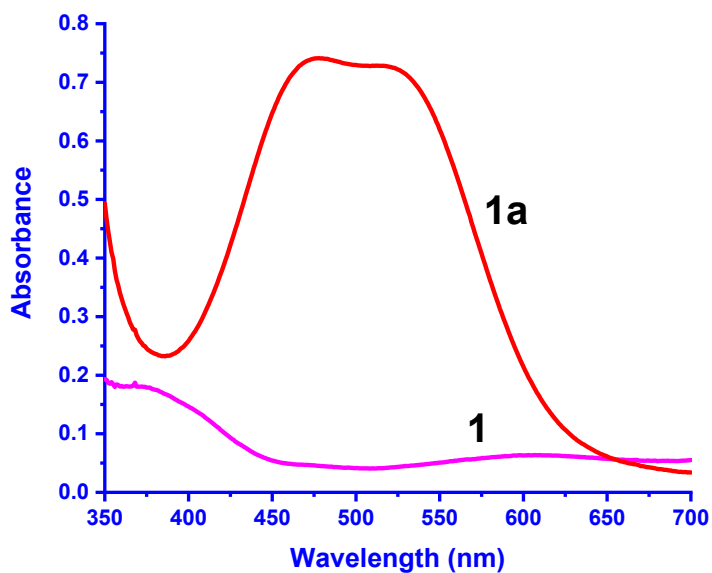

**Fig. S11.** Electronic absorption spectra of complexes **1** and the intermediate **1a** formed from **1** in methanol solution upon addition of  $\text{Et}_3\text{N}$  ( $2 \times 10^{-4}$  M) to **1** ( $1 \times 10^{-4}$  M) at 25 °C.

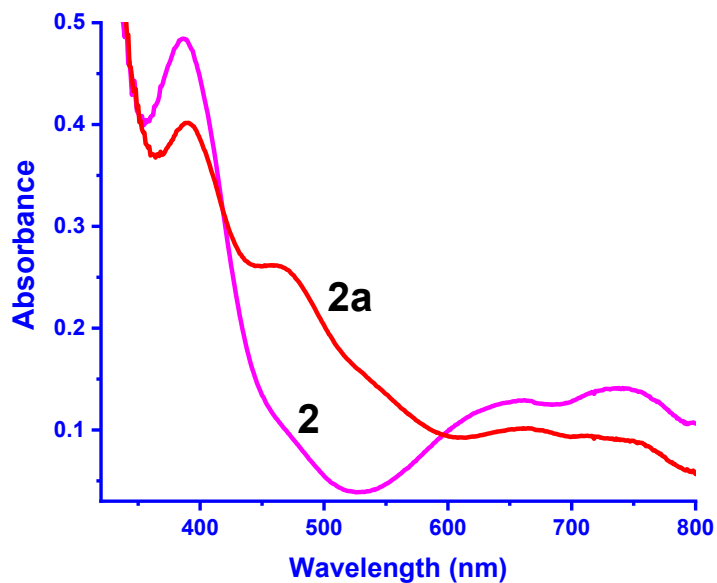

**Fig. S12.** Electronic absorption spectra of **2** and the intermediate **2a** formed from **2** in methanol solution upon addition of  $\text{Et}_3\text{N}$  ( $2 \times 10^{-4}$  M) to **2** ( $1 \times 10^{-4}$  M) at 25 °C.

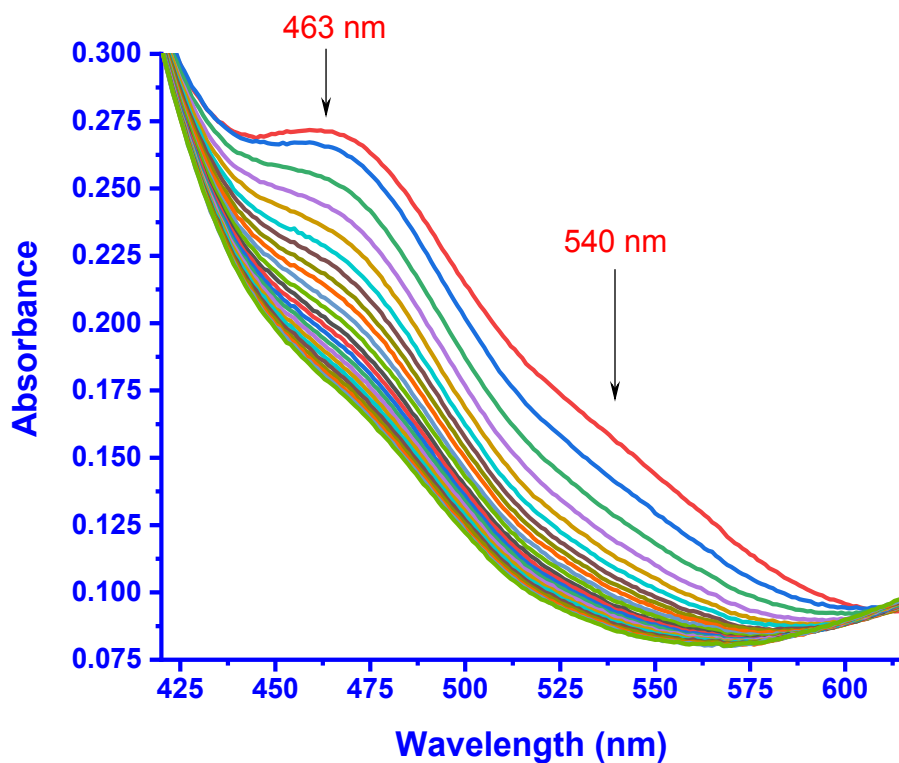

**Fig. S13.** Decrease in absorption of **2a**, generated in situ by adding  $\text{Et}_3\text{N}$  ( $4 \times 10^{-4}$  M) to **2** ( $2 \times 10^{-4}$  M), upon exposure to atmospheric  $\text{CO}_2$ , followed at 1 min interval at  $25^\circ\text{C}$ .

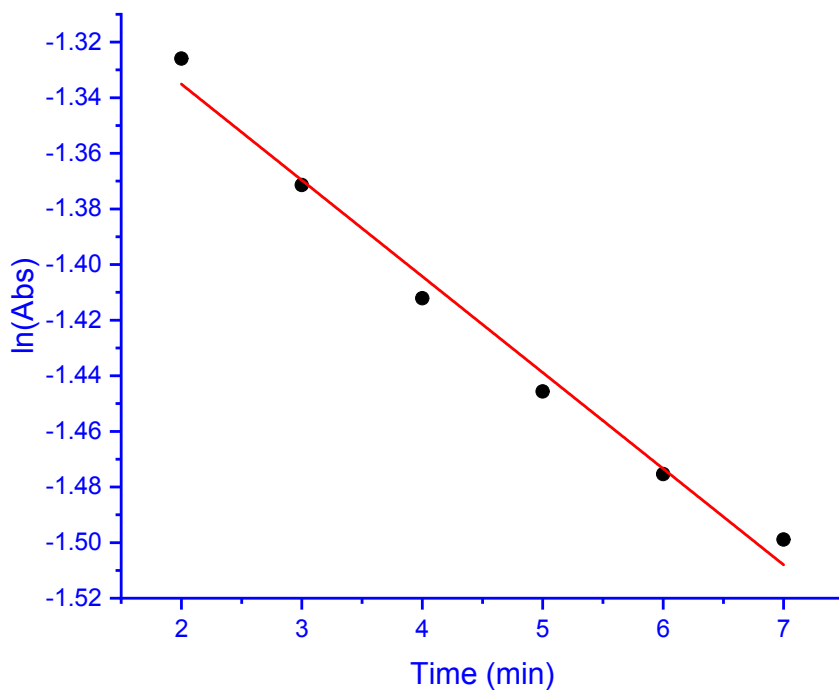

**Fig. S14.** Plot of  $\ln(\text{Abs})$  vs time observed at 463 nm,  $k_{\text{obs}}$ ,  $5.8 \pm 0.3 \times 10^{-4} \text{ s}^{-1}$ ;  $t_{1/2} = 0.33$  hrs.

**Table S3.** Computed structural parameters of the HOMO and LUMO energy values for the intermediate complex species **1a** and **2a**

|             | <b>1a</b> | <b>2a</b> |
|-------------|-----------|-----------|
| HOMO-2 (eV) | -7.2507   | -6.9416   |
| HOMO-1 (eV) | -6.6023   | -6.5294   |
| HOMO (eV)   | -6.3604   | -6.2700   |
| LUMO (eV)   | -1.8444   | -1.6393   |
| LUMO+1 (eV) | -1.6501   | -0.4705   |
| LUMO+2 (eV) | -1.2139   | -0.1295   |

**Table S4.** Computed energy gap values for complexes **1a** and the intermediate **2a**

| <b>Band gap (eV)</b> | <b>1a</b> | <b>2a</b> |
|----------------------|-----------|-----------|
| HOMO – LUMO (eV)     | 4.5160    | 4.6307    |
| LUMO – LUMO+1 (eV)   | 0.1943    | 1.1688    |

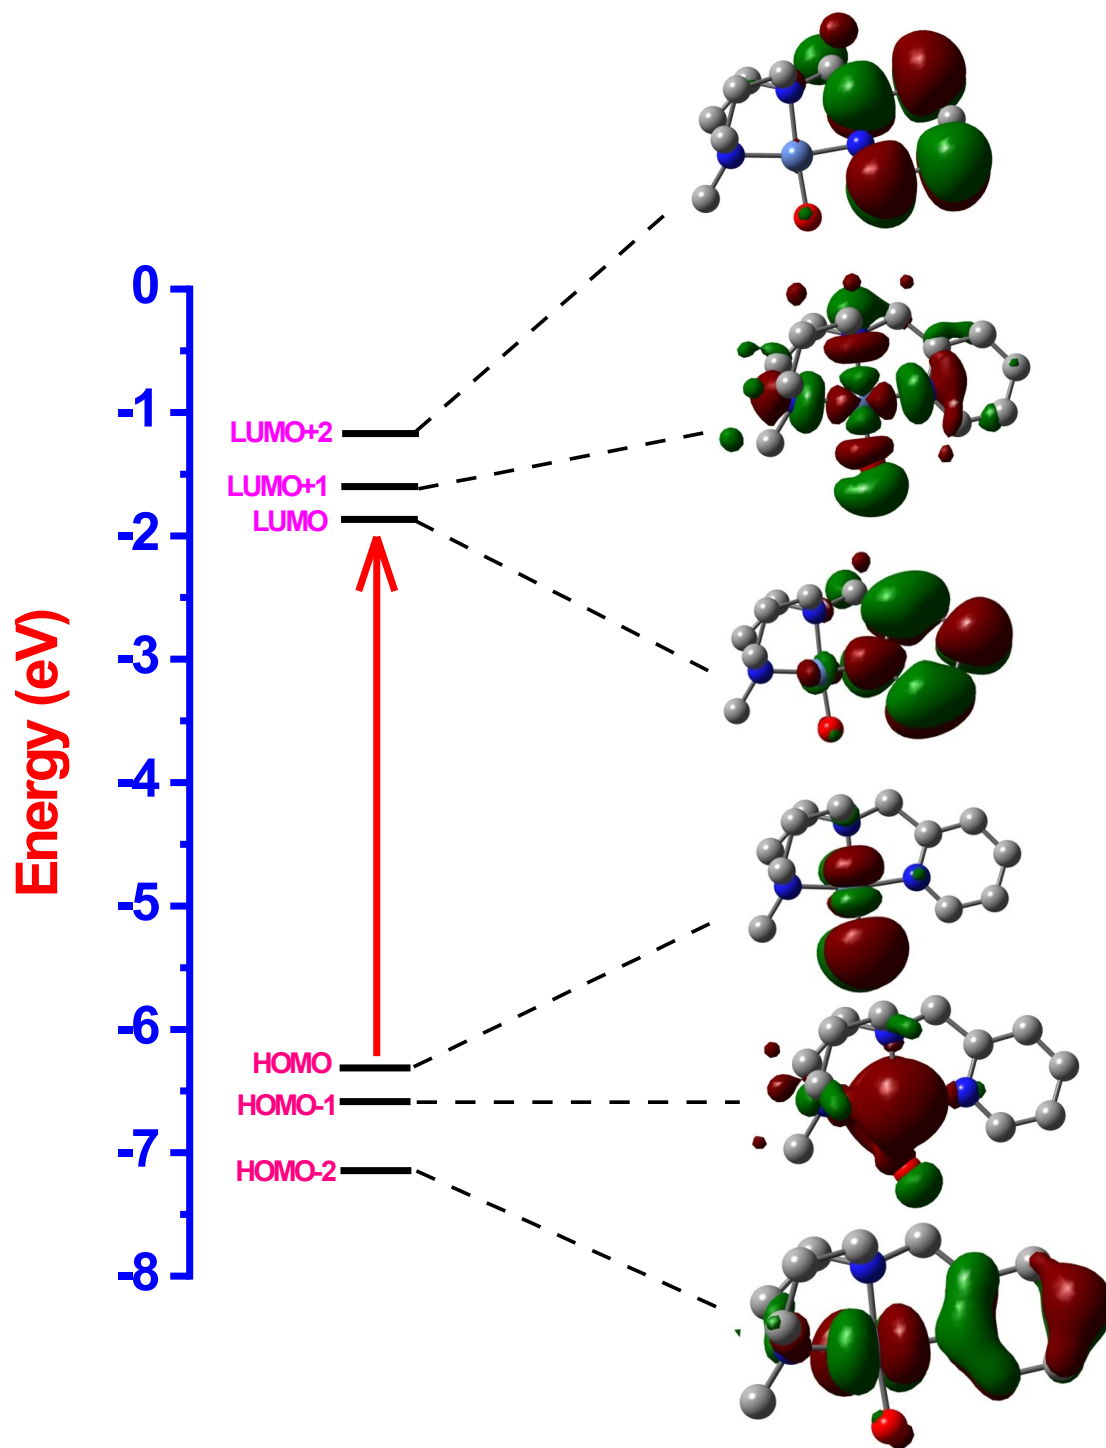

Fig. S15. Schematic MO diagram for the intermediate complex 1a

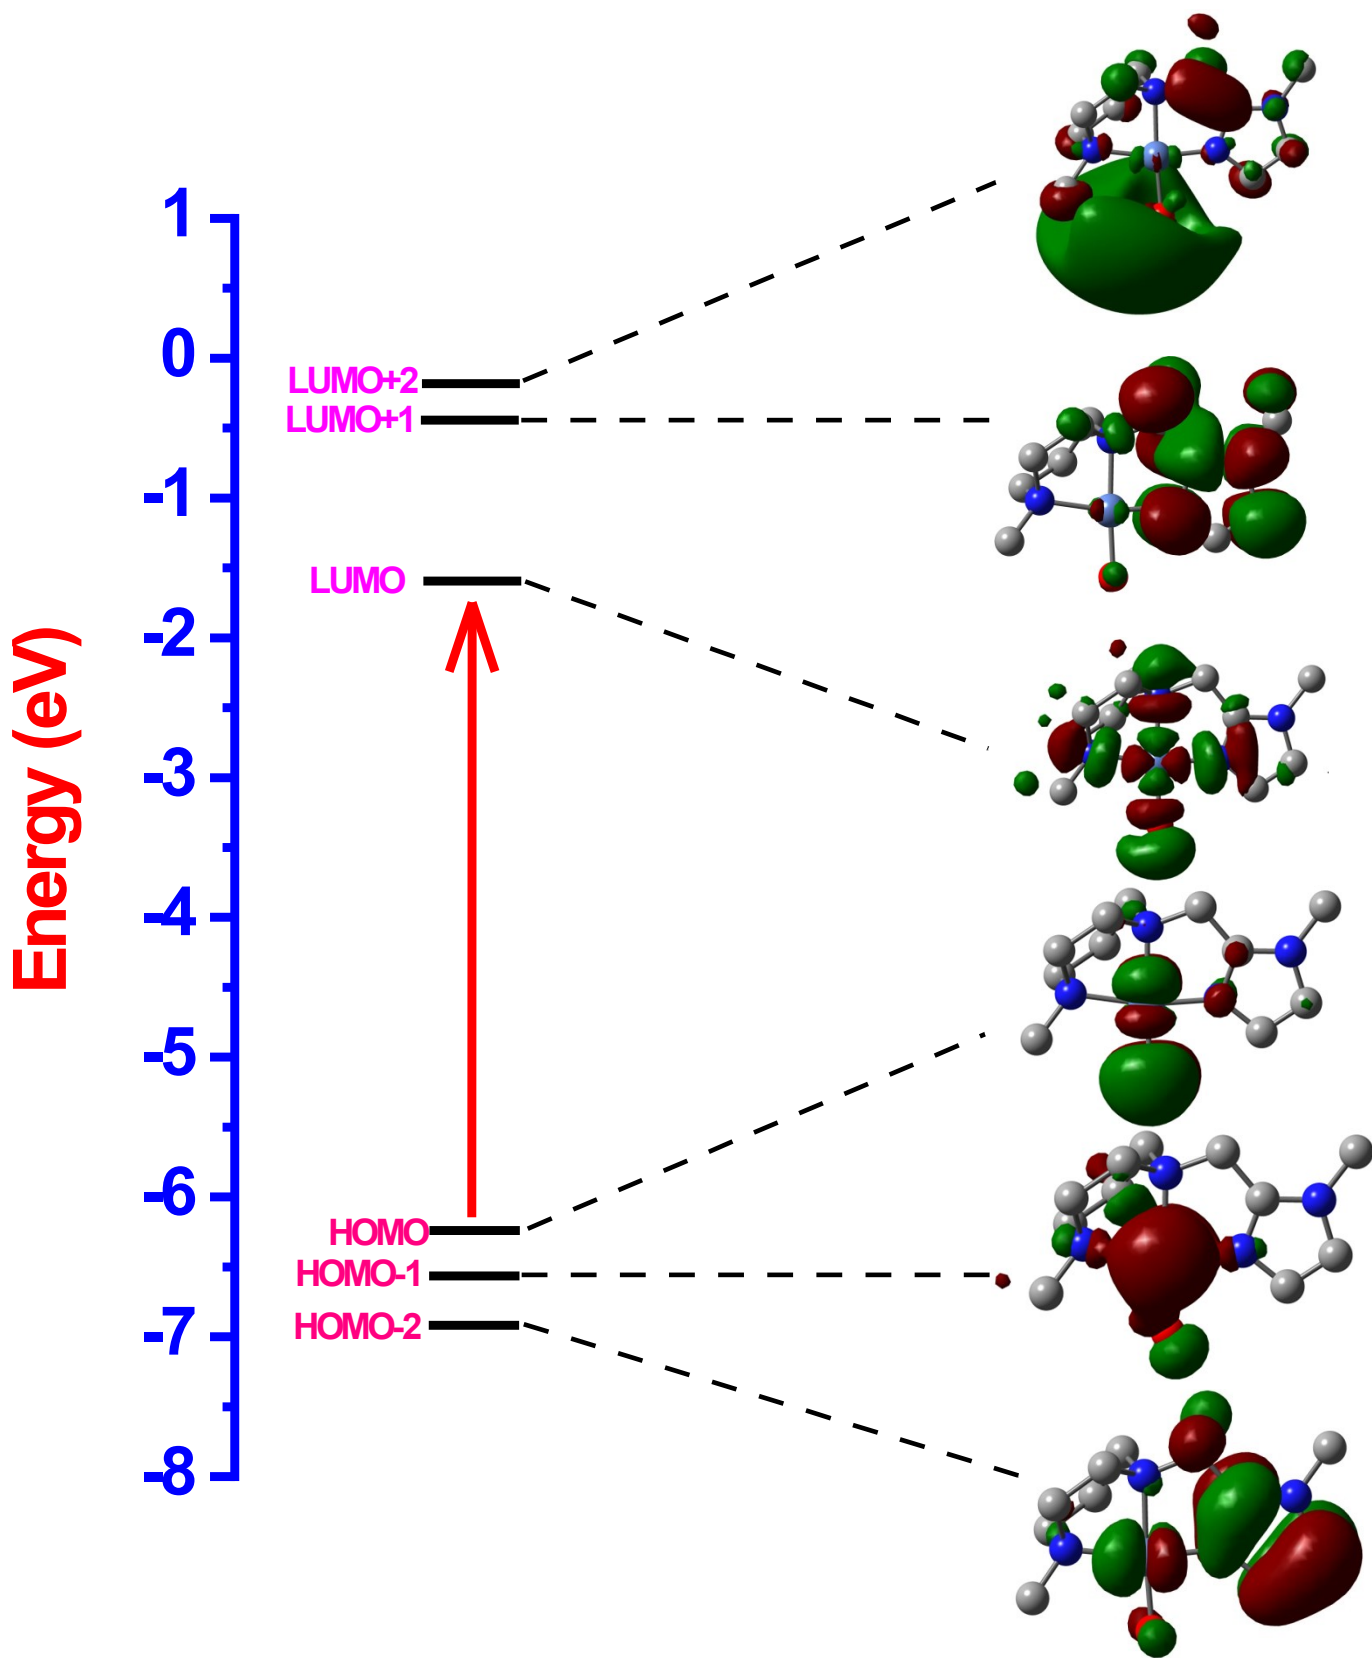

Fig. S16. Schematic MO diagram for the intermediate complex species 2a

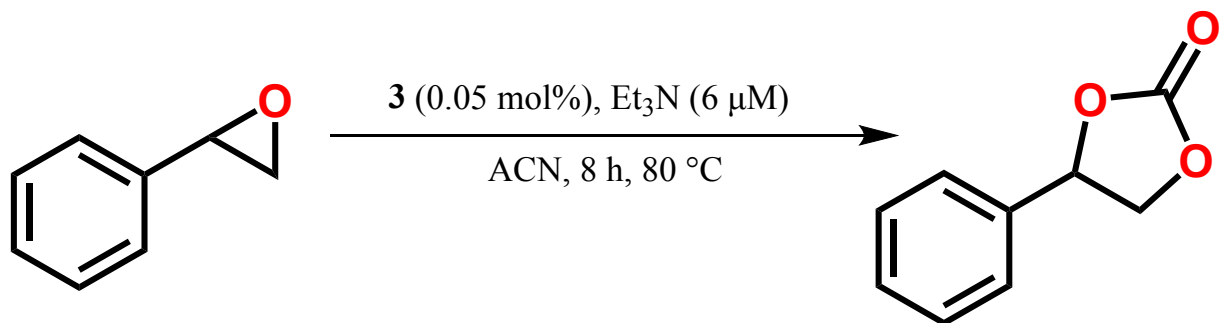

**Scheme S1.** Conversion of epoxide into cyclic carbonates.

**Table S5.** Reaction of Styrene epoxide (10 mmol) with 1 atm pure CO<sub>2</sub> using catalyst **3** (0.05 mol%) and Et<sub>3</sub>N as a base (6 μM) for a period of 8 hrs.

| Entry | Temperature (°C) | Yield (%) | TON  | TOF (h <sup>-1</sup> ) | Selectivity (%) |
|-------|------------------|-----------|------|------------------------|-----------------|
| 1     | 30               | 9         | 180  | 23                     | >99             |
| 2     | 40               | 25        | 500  | 63                     | >99             |
| 3     | 50               | 39        | 780  | 98                     | >99             |
| 4     | 60               | 55        | 1100 | 138                    | >99             |
| 5     | 80               | 72        | 1440 | 180                    | >99             |

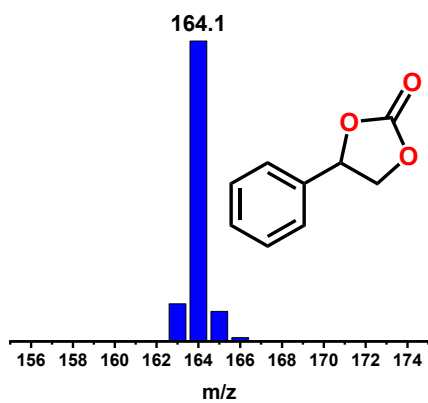

**Fig. S17.** GC-MS spectra of 4-phenyl-1,3-dioxolan-2-one.



42 #32 RT: 0.31 AV: 1 NL: 6.27E9

T: FTMS + p ESI Full ms [133.4000-2000.0000]

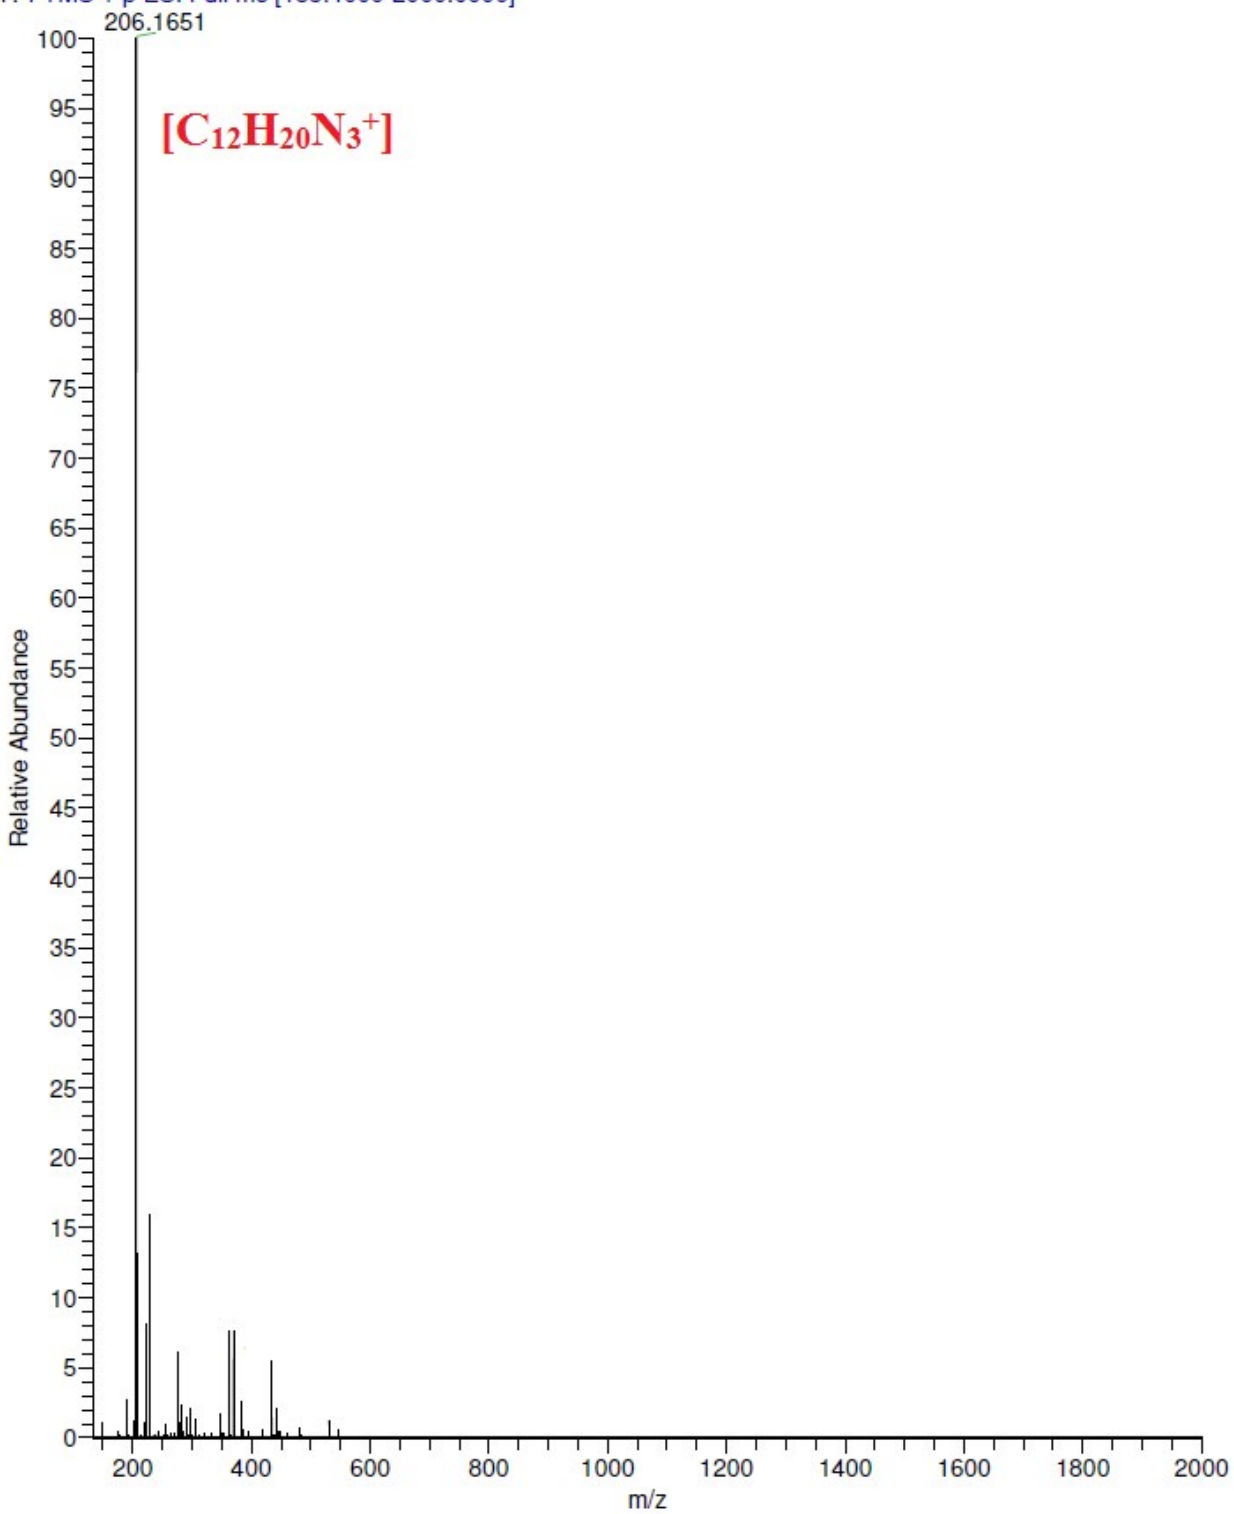

Fig. S18. High Resolution Mass Spectra of L1 in methanol solution ( $1 \times 10^{-3}$  M) at 25 °C.

Hm-Im-3N #47 RT: 0.46 AV: 1 NL: 9.35E9  
T: FTMS + p ESI Full ms [100.0000-1500.0000]

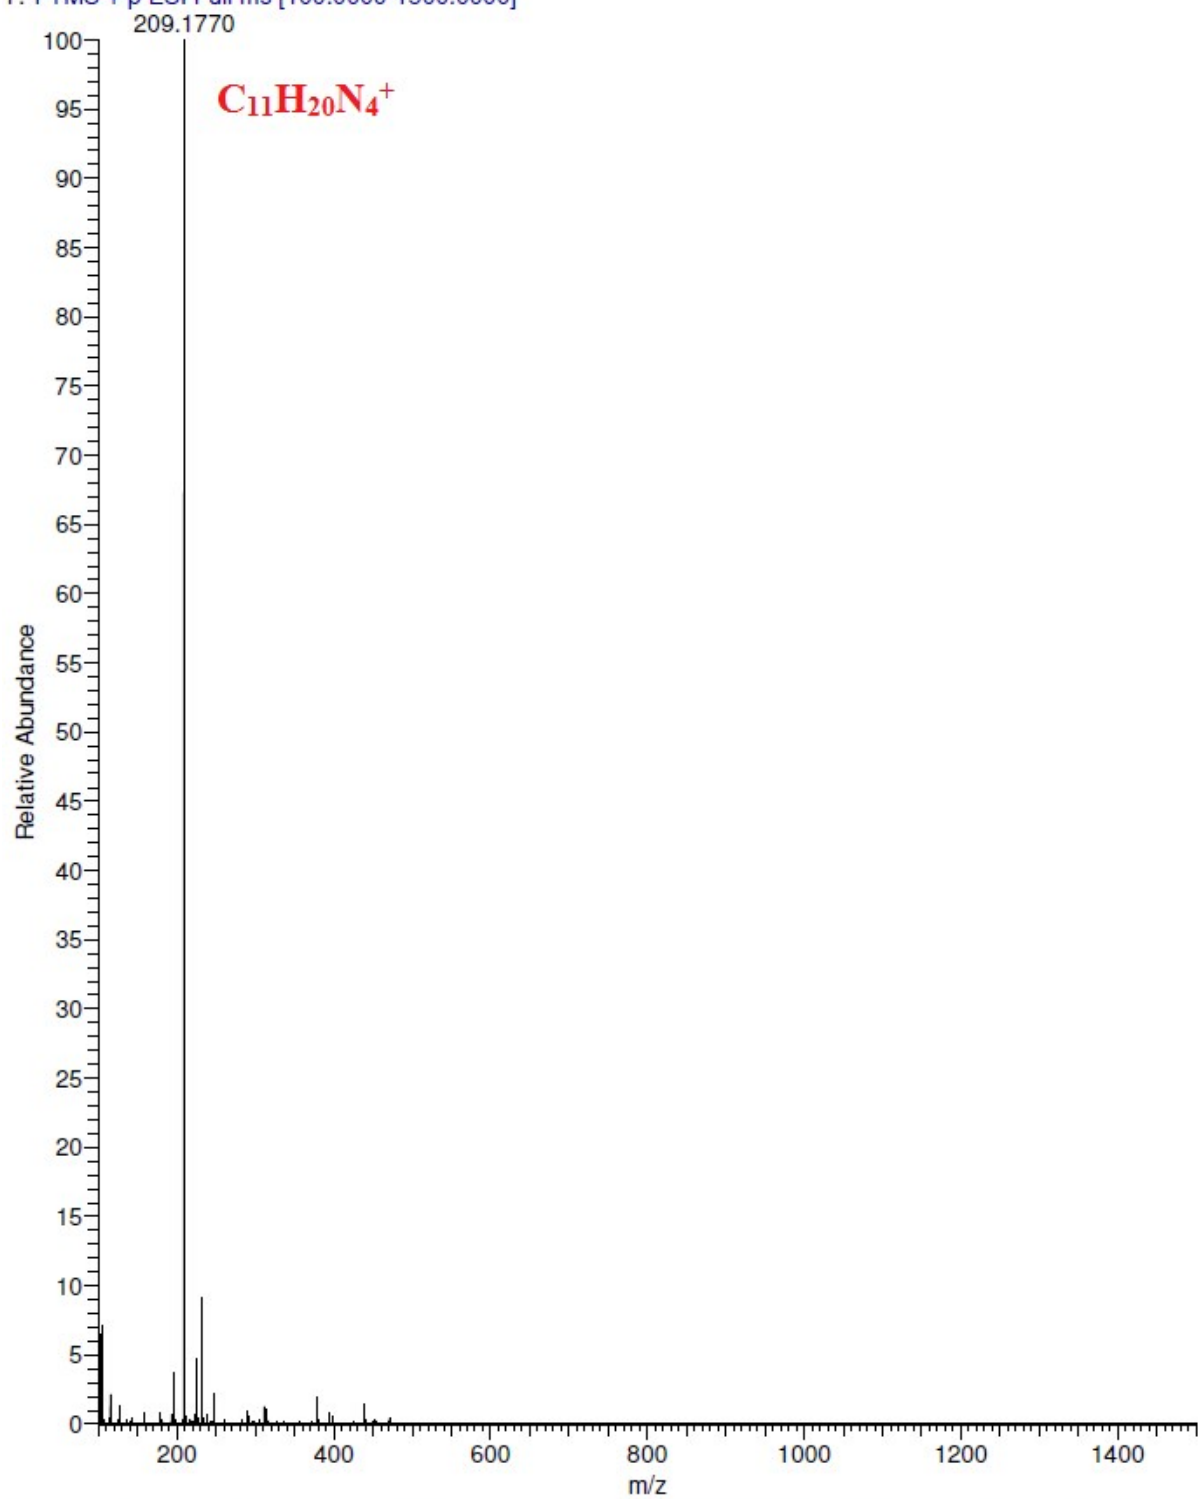

**Fig. S19.** High Resolution Mass Spectra of L2 in methanol solution ( $1 \times 10^{-3}$  M) at 25 °C.

Ni-Hm-Py-3N #35 RT: 0.35 AV: 1 NL: 3.46E9  
T: FTMS + p ESI Full ms [100.0000-1500.0000]

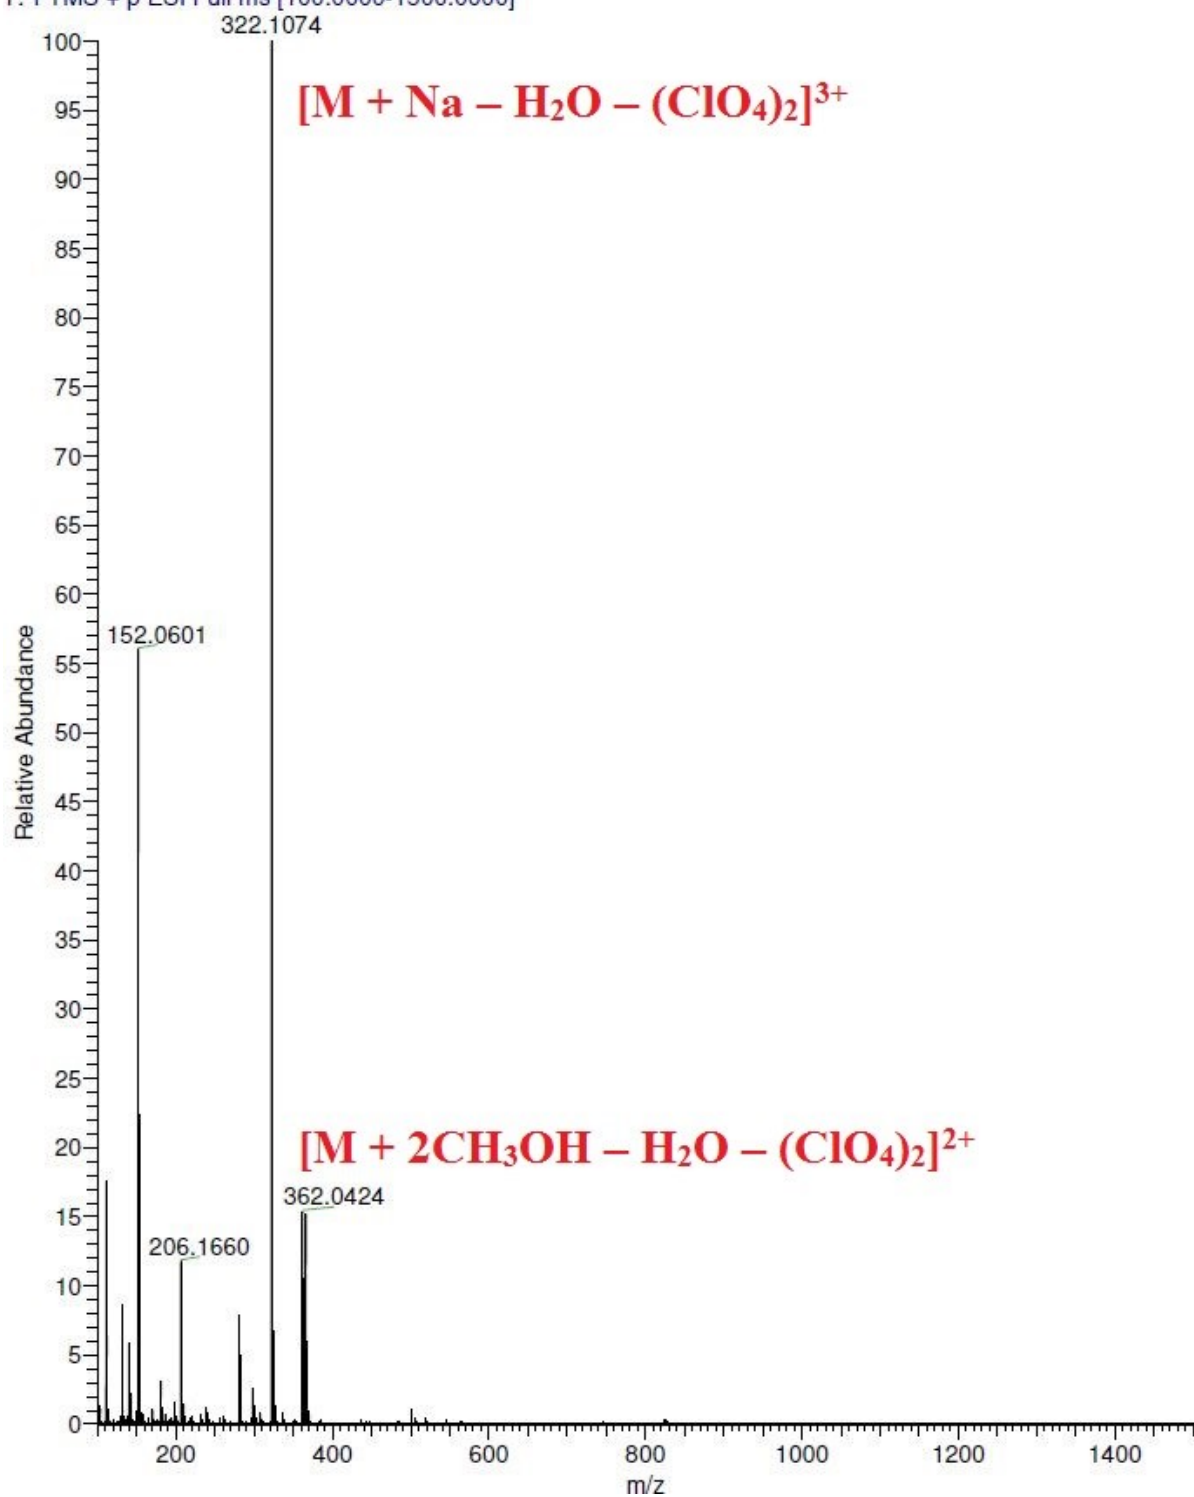

**Fig S20.** High Resolution Mass Spectra of  $[Ni(L1)(H_2O)_3](ClO_4)_2$  **1** in methanol solution ( $1 \times 10^{-3}$  M) at 25 °C.

Ni-HM-In-3N #33 RT: 0.33 AV: 1 NL: 1.02E9  
T: FTMS - p ESI Full ms [150.0000-2000.0000]

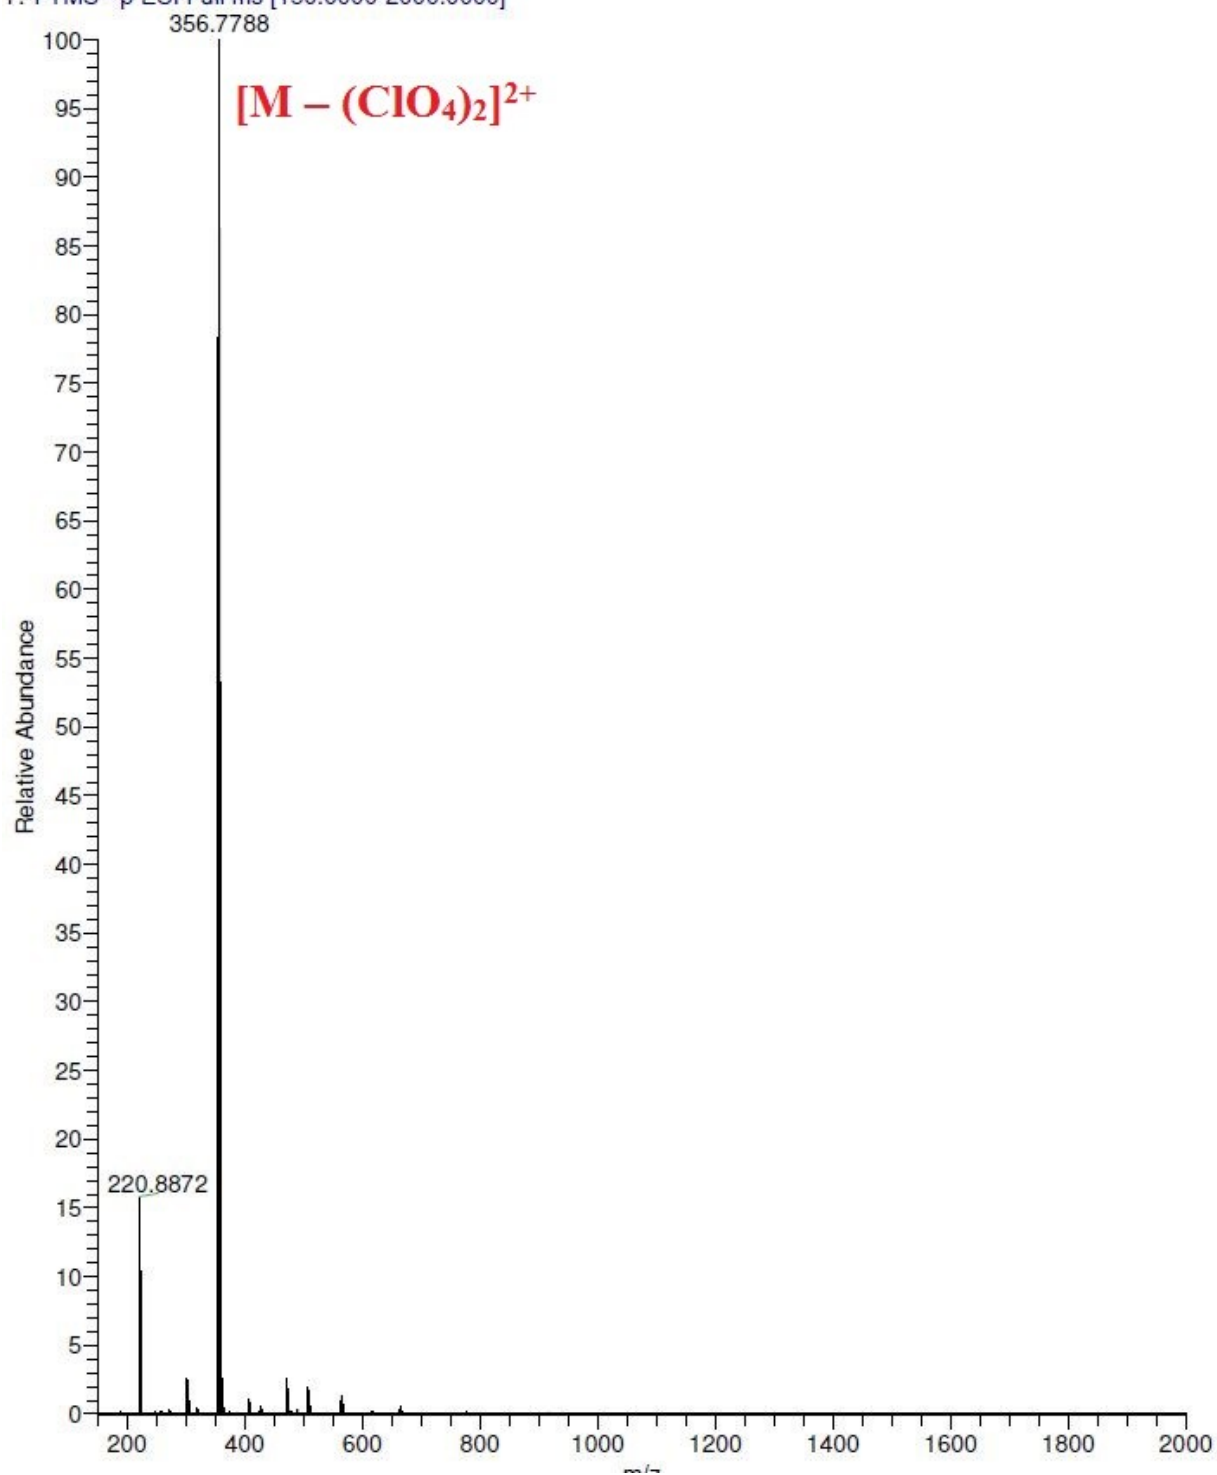

**Fig. S21.** High Resolution Mass Spectra  $[Ni(L2)(H_2O)_3](ClO_4)_2 \cdot 2H_2O$  **2** in methanol solution ( $1 \times 10^{-3}$  M) at 25 °C.

Di-Ni-MeOH #37 RT: 0.37 AV: 1 NL: 2.26E9  
T: FTMS + p ESI Full ms [100.0000-1000.0000]

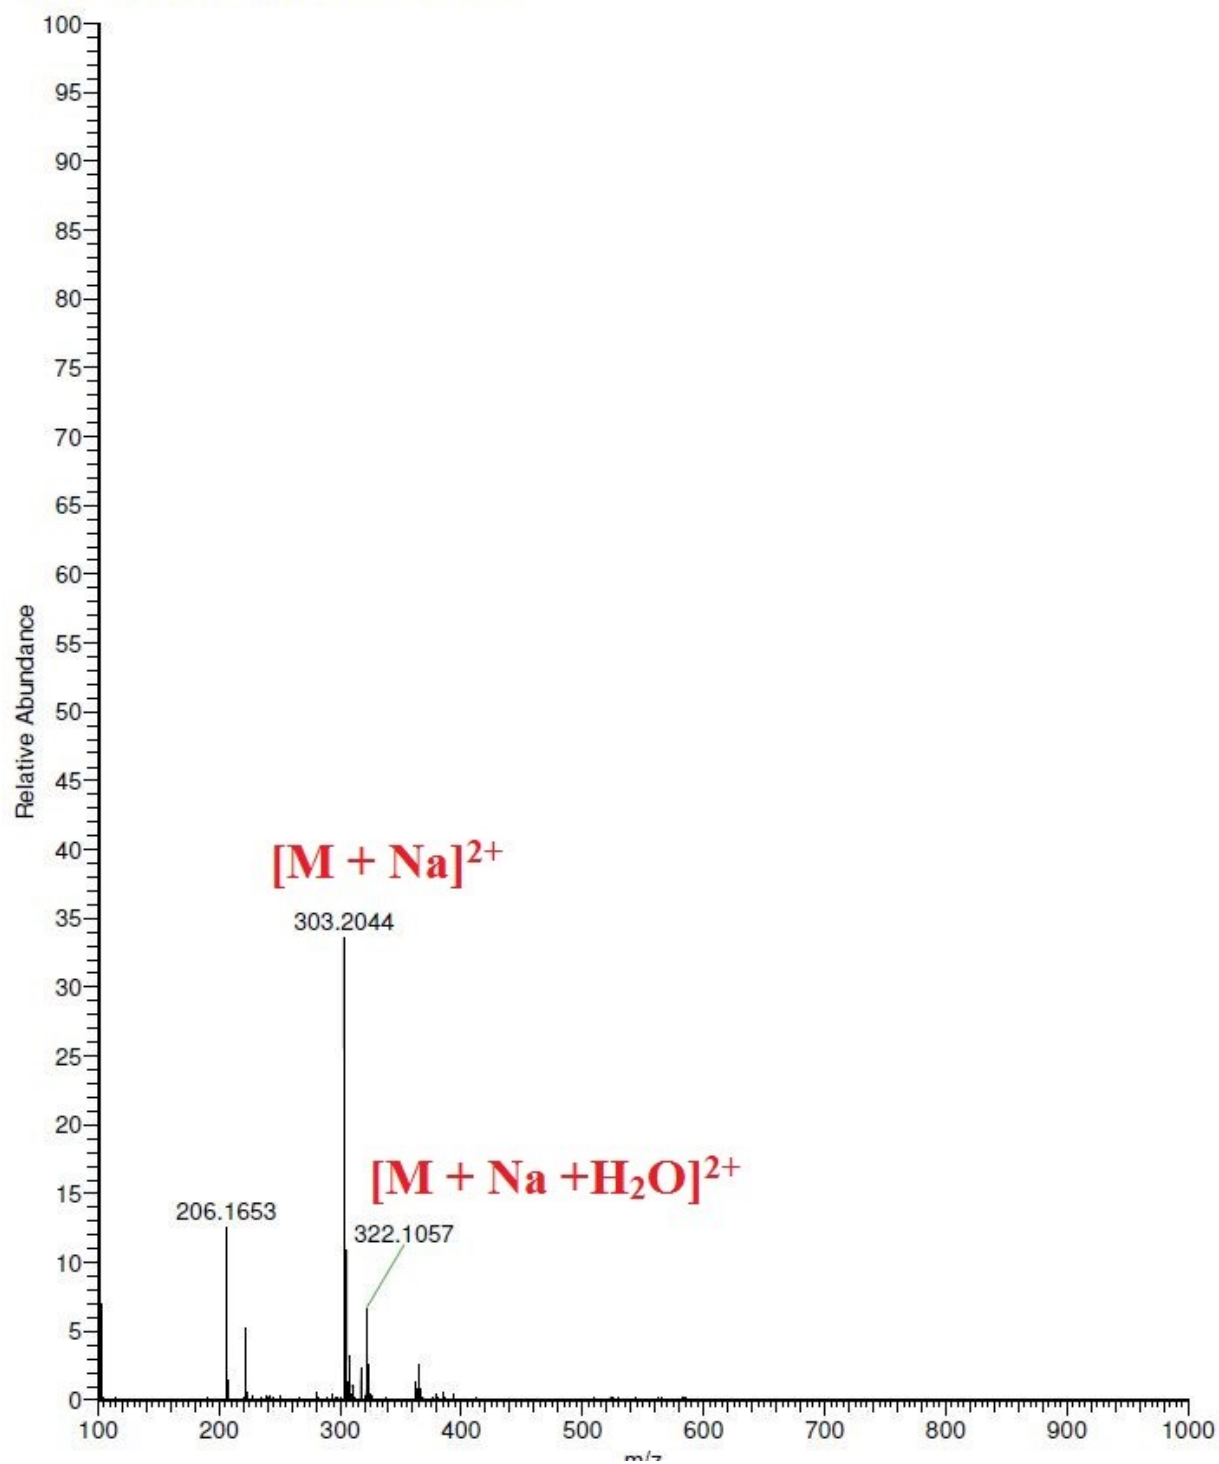

**Fig. S22.** High Resolution Mass Spectra of intermediate **1a** methanol solution ( $1 \times 10^{-3}$  M) at 25 °C.

Di-Ni-EtOH #37 RT: 0.36 AV: 1 NL: 1.80E9  
T: FTMS + p ESI Full ms [100.0000-1000.0000]

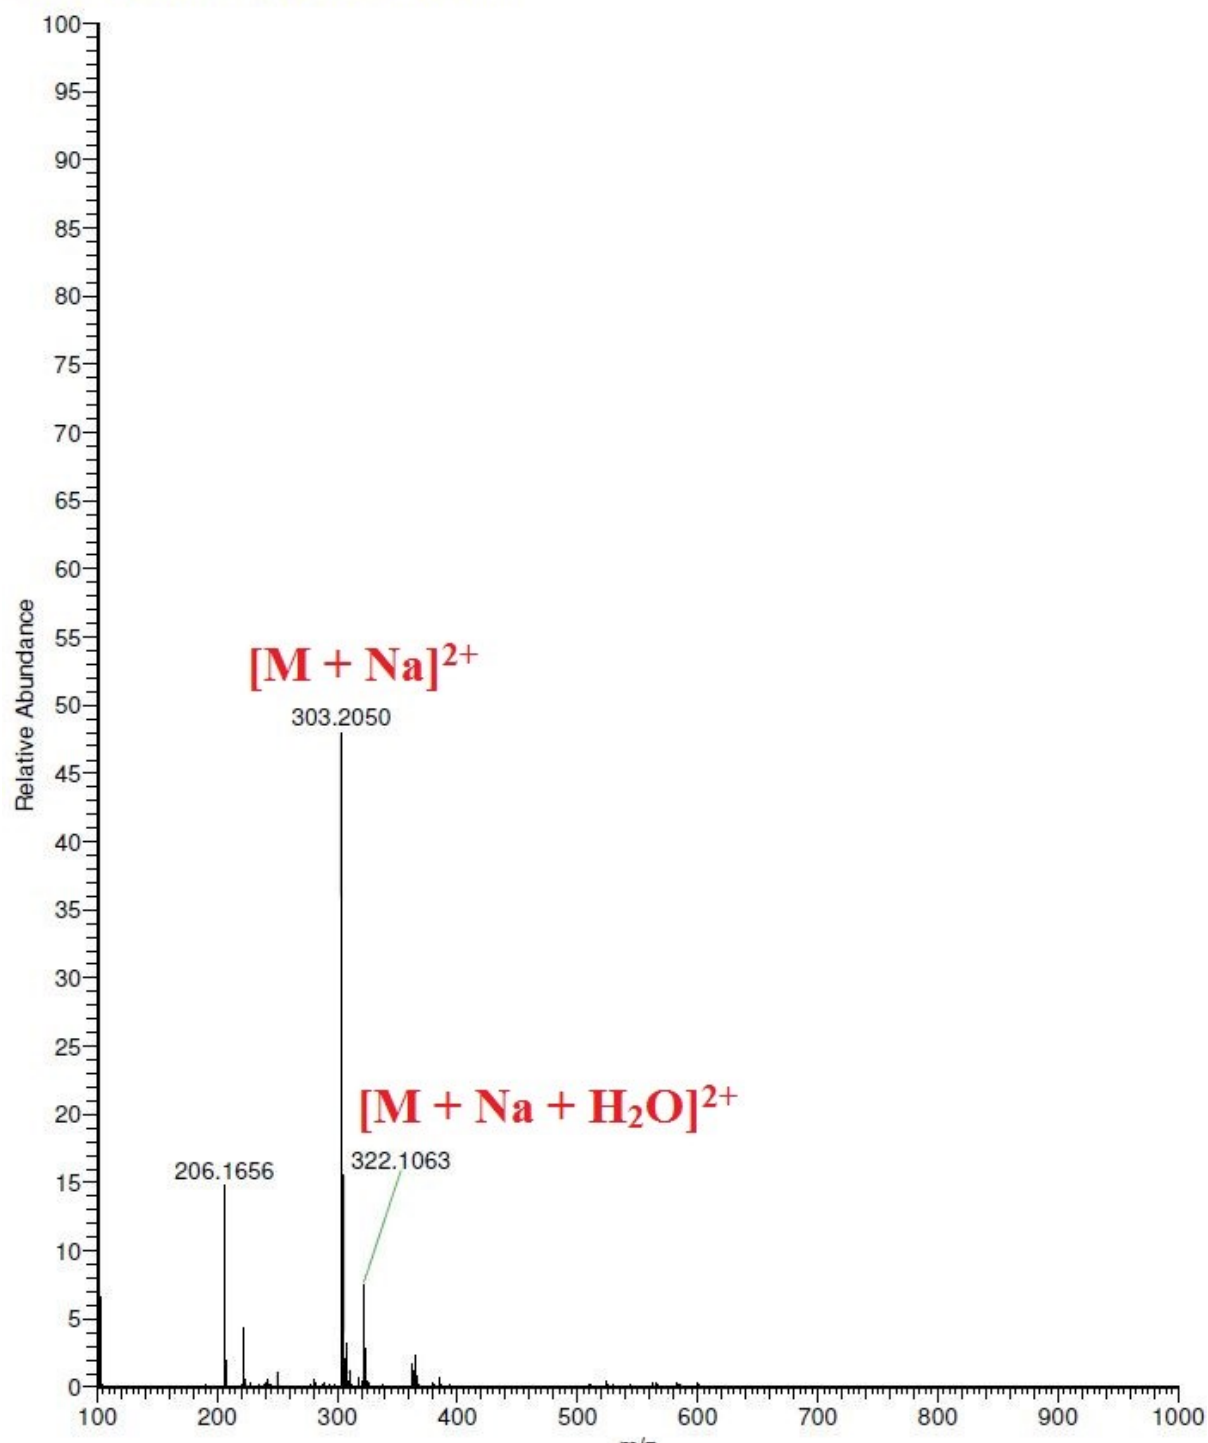

**Fig. S23.** High Resolution Mass Spectra of the intermediate **1a** in ethanol solution ( $1 \times 10^{-3}$  M) at 25 °C.

Ni-Py #37 RT: 0.36 AV: 1 NL: 2.32E9  
T: FTMS + p ESI Full ms [100.0000-1000.0000]

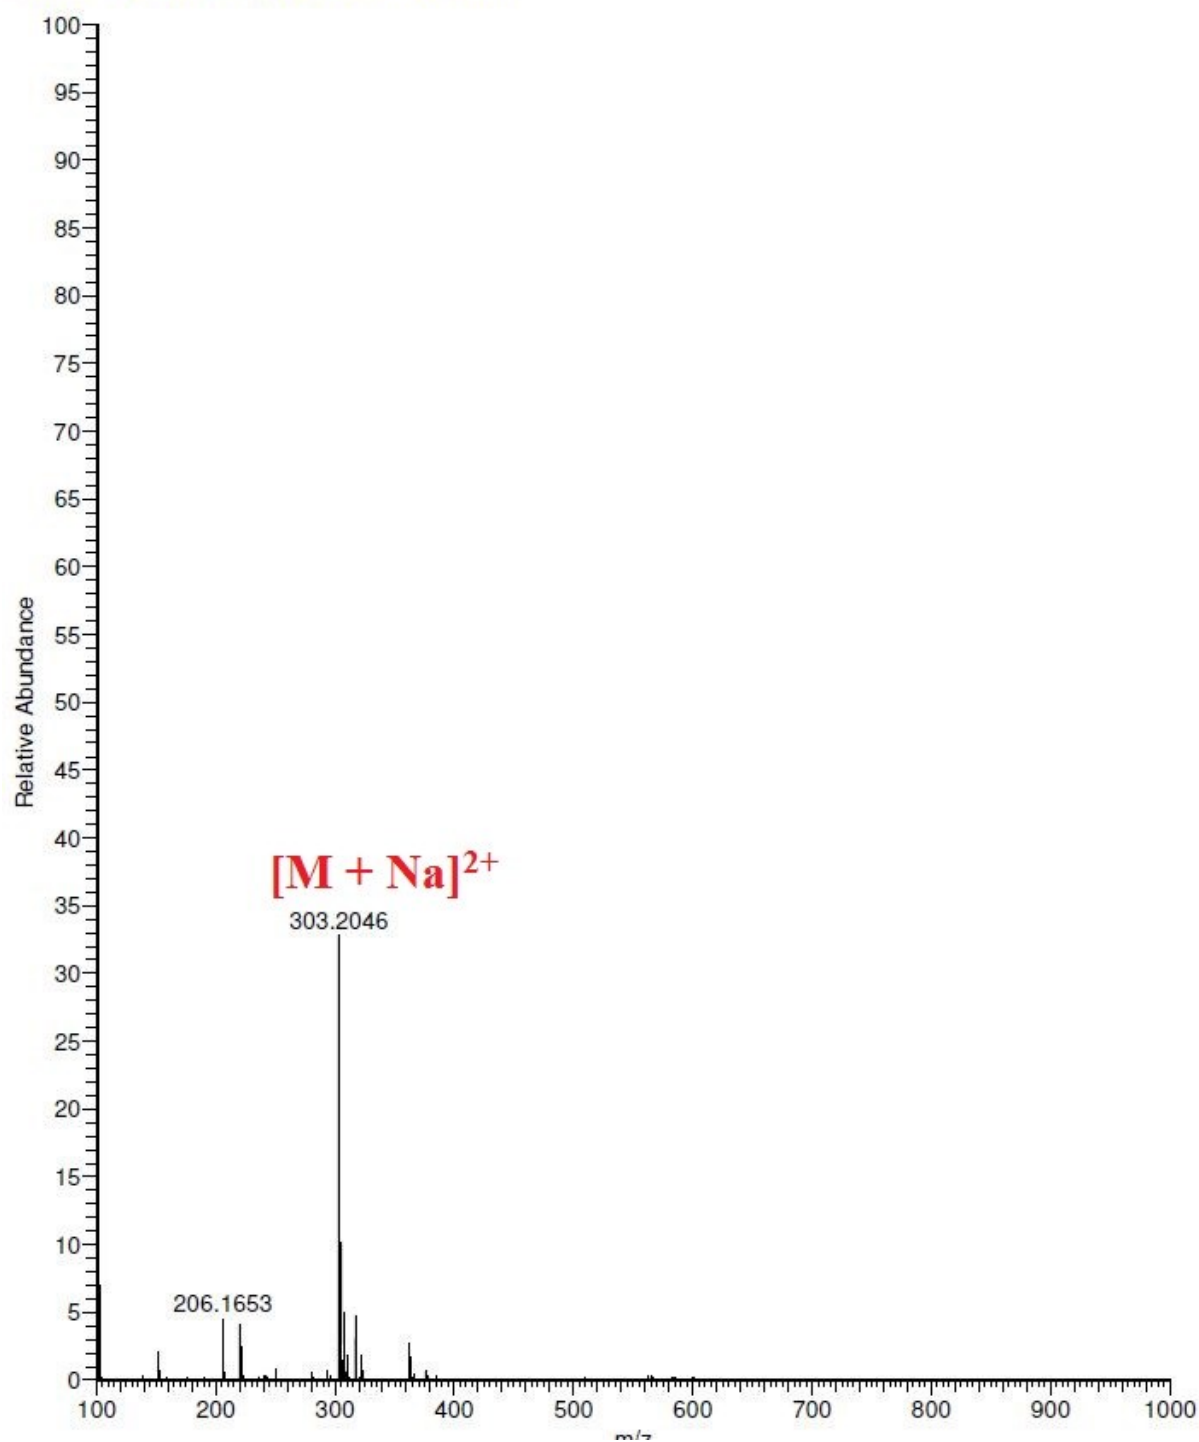

**Fig. S24.** High Resolution Mass Spectra of the intermediate **1a** in isopropanol solution ( $1 \times 10^{-3}$  M) at 25 °C.

dini-Hmpy #44 RT: 0.43 AV: 1 NL: 2.02E9  
T: FTMS + p ESI Full ms [150.0000-2000.0000]

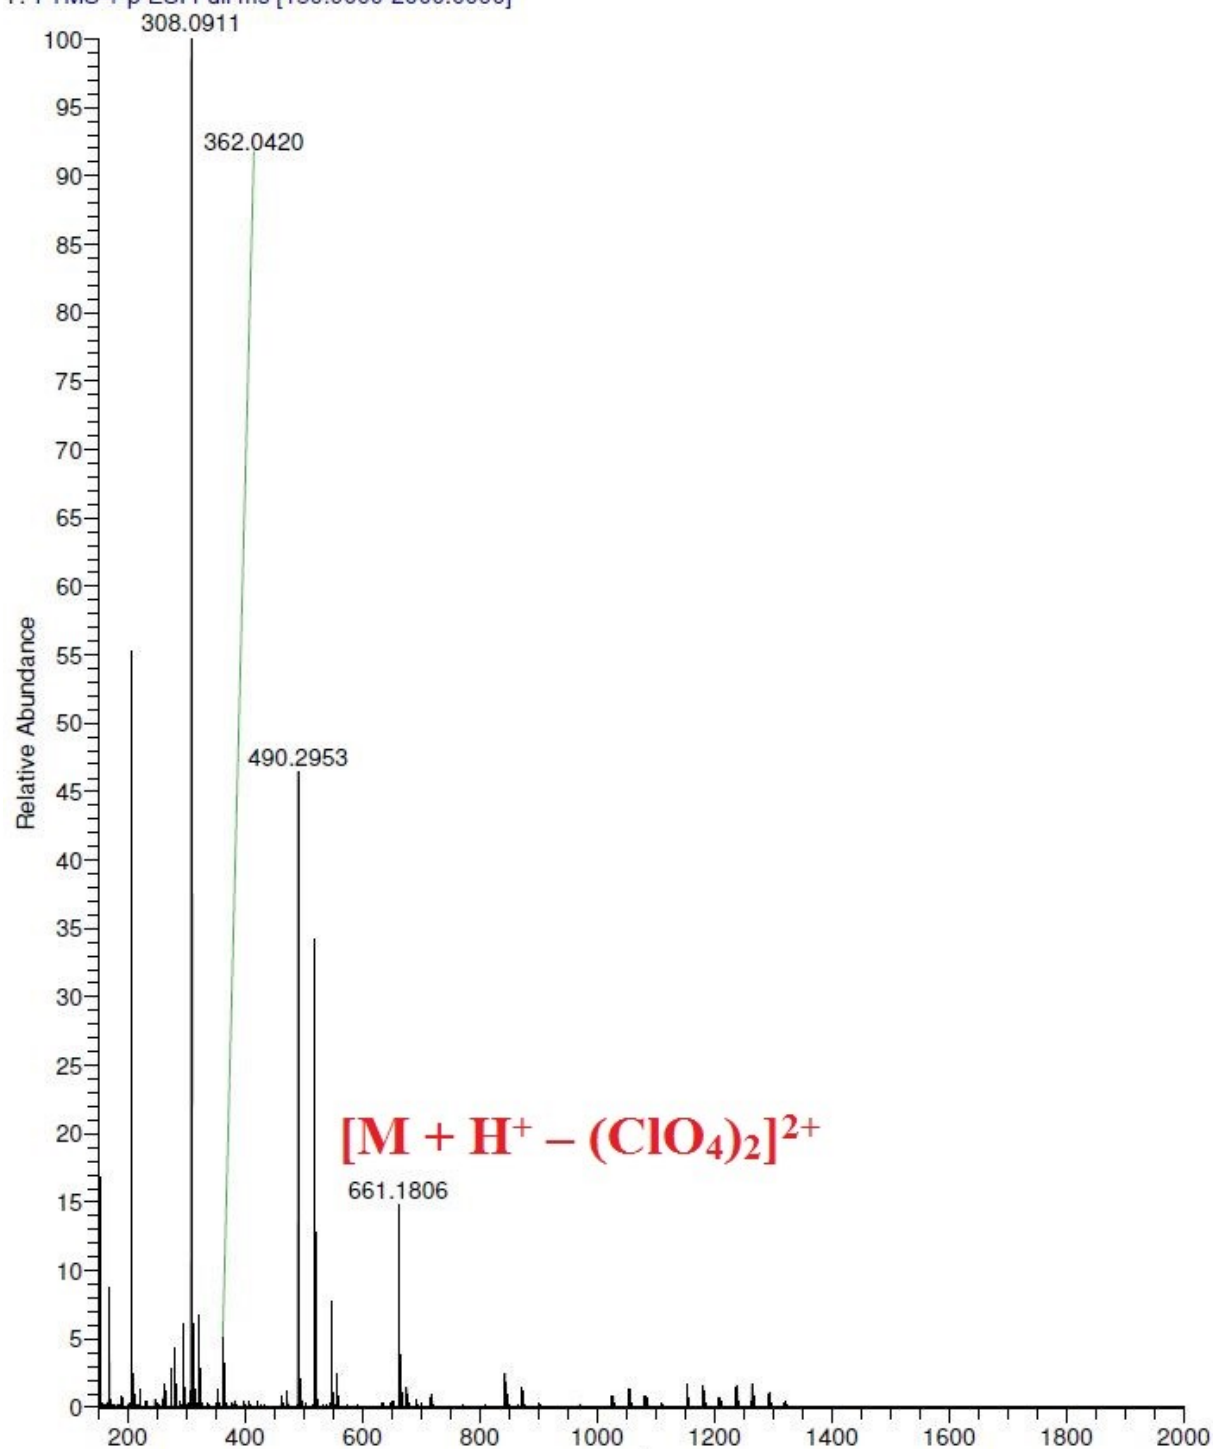

**Fig. S25.** High Resolution Mass Spectra of  $[Ni_2(L1)_2(\mu-CO_3)(H_2O)_2](ClO_4) \cdot 2H_2O$  **3** in methanol solution ( $1 \times 10^{-3}$  M) and at 25 °C.



## References

S1. D. F. Evans, *J. Chem. Soc.* 1959, 2003-2005.

S2. J. Lölinger, R. Scheffold, *J. Chem. Edu.*, 1972, 646-647.
